# Supplementary material
Source: Springer Nature journal article supplement (https://www.springermedizin.de/resource/supplementary/13075_2010_2892_MOESM2_ESM.pdf/9693124)

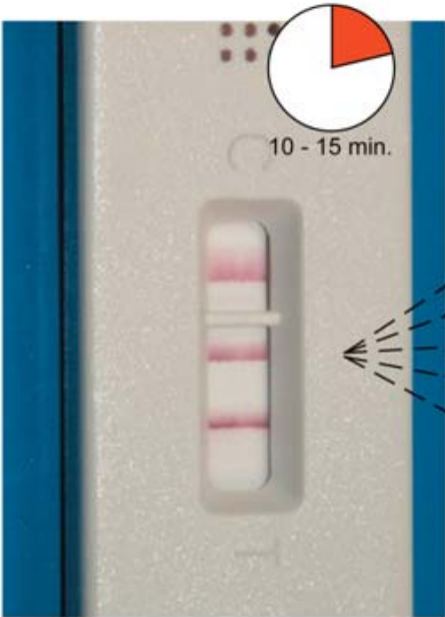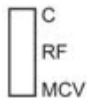

invalid

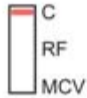

negative

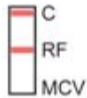

RF positive

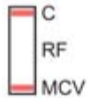

MCV positive

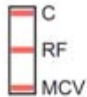

RF and MCV positive

Supplement: MOESM2 [file 9693124]
